# Supplementary material
Source: ML conference proceedings conference paper supplement (https://aclanthology.org/2024.semeval-1.29)
Supplement: SupplementaryMaterial [file 2024.semeval-1.29.SupplementaryMaterial.zip]

| Lang.                  | Sentence 1                                                                                 | Sentence 2                                                                                          | Score |
|------------------------|--------------------------------------------------------------------------------------------|-----------------------------------------------------------------------------------------------------|-------|
| Amharic                | መግለጫውን የተከታተለው የአዲስ አበባው ዘጋጢያችን ሰሎሞን ሙጭ ዝርዝር ዘገባ አለው                                       | በስፍራው ተገኝቶ የተከታተለው የአዲስ አበባው ዘጋጢያችን ሰሎሞን ሙጭ ያጠናቀረውን ልኮልናል                                           | 0.88  |
| Moroccan Arabic        | 10- فالمغرب الصحية الطوارئ حالة تمديد                                                      | دجنب 10- فالمغرب الصحية الطوارئ حالة تمديد                                                          | 0.72  |
| Spanish                | Una mujer a punto de comer trucha.                                                         | Una mujer a punto de comer pescado.                                                                 | 1.0   |
| English                | It that happens, just pull the plug.                                                       | if that ever happens, just pull the plug.                                                           | 1.0   |
| Hausa                  | Yan bindiga sun yi garkuwa da mutane 11 a Shimfida, jihar Katsina                          | Yan bindiga sun yi garkuwa da dalibai mata a jihar Zamfara AN GUDU NA A TSIRA BA                    | 0.59  |
| Kinyarwanda            | Ibicirizwa by'abakiri bayo irabibungabunga Bimwe mu bikoresho Romeobuy                     | ibonera abakiriya bayo Ijambo a muritegurirwa na Rejoice Ministries                                 | 0.19  |
| Marathi                | गुरु नानक देव आणि त्यांची शिकवण-दिक्षा संपूर्ण मानवजातीसाठी                                | केवळ भारतातीलच नाही, तर संपूर्ण मानवजातीसाठी मार्गदर्शक आहे                                         | 1.0   |
| Algerian Arabic        | ام فيها ناكل راني ذركا جربتھا وليد ام الصحة يعطيك بنينة شحال                               | روعة جا مسمن ليوم جربت وليد او الصحة يعطيك وفيه منتبعة ريان ام انا                                  | 0.62  |
| Telugu                 | జమ్మూకాశ్మీర్లో మంచుకొండచరియలు విరిగిపడిన పలువురు                                          | ఐదుగురు మృతి చెందారు                                                                                | 0.88  |
| Afrikaans              | My eerste stukkie advies is dat jy realities moet wees oor die afstand wat jy wil hengel   | Dit bring tot n einde die maanverkenningsprogram van die Verenigde State.                           | 0.19  |
| Indonesian             | Pendidikan Desa Pusaka memiliki 4 sekolah.                                                 | Pendidikan Desa Serumpun Buluh memiliki 4 sekolah.                                                  | 0.83  |
| Hindi                  | {देश में कोरोना वायरस से मौत का आंकड़ा 100 के पार पहुंचा, पिछले 12 घंटे में 26 की गई जान}. | {देश में कोरोना वायरस का कहर तेजी से बढ़ता जा रहा है।}                                              | 0.72  |
| Punjabi                | {ਪੰਜਾਬ ਤੋਂ ਦੂਜੀ ਵਾਰ ਵਿਧਾਇਕ ਬਣੇ ਅਮਨ ਅਰੇੜਾ ਦਾ ਮੰਤਰੀ ਬਣਨਾ ਤੈਅ ਹੈ}                             | {ਇਨ੍ਹਾਂ ਵਿੱਚ ਦੂਜੀ ਵਾਰ ਵਿਧਾਇਕ ਬਣੇ ਪ੍ਰੋ. ਬਲਜਿੰਦਰ ਕੌਰ ਜਾਂ ਸਰਵਜੀਤ ਮਾਣੂਕੇ ਨੂੰ ਵੀ ਮੰਤਰੀ ਬਣਾਇਆ ਜਾ ਸਕਦਾ ਹੈ} | 0.56  |
| Modern Standard Arabic | هذا الاعوجاج                                                                               | هذه السحابة النقطية                                                                                 | 0.83  |
